# Post-Transcriptional Regulation of Cadherin-11 Expression by GSK-3 and $\beta$ -Catenin in Prostate and Breast Cancer Cells

Anne K. Farina, Yong-Sik Bong, Carolyn M. Feltes, Stephen W. Byers\*

Lombardi Comprehensive Cancer Center and Departments of Oncology and Biochemistry, Molecular and Cellular Biology, Georgetown University School of Medicine, Washington, D. C., United States of America

## Abstract

**Background:** The cell-cell adhesion molecule cadherin-11 is important in embryogenesis and bone morphogenesis, invasion of cancer cells, lymphangiogenesis, homing of cancer cells to bone, and rheumatoid arthritis. However, very little is known about the regulation of cadherin-11 expression.

**Methodology/Principal Findings:** Here we show that cell density and GSK-3 $\beta$  regulate cadherin-11 levels in cancer cells. Inactivation of GSK3 $\beta$  with lithium chloride or the GSK3 inhibitor BIO and GSK3 $\beta$  knockdown with siRNA repressed cadherin-11 mRNA and protein levels. RNA Polymerase II chromatin immunoprecipitation experiments showed that inhibition of GSK3 does not affect cadherin-11 gene transcription. Although the cadherin-11 3'UTR contains putative microRNA target sites and is regulated by Dicer, its stability is not regulated by GSK3 inhibition or density. Our data show that GSK3 $\beta$  regulates cadherin-11 expression in two ways: first a  $\beta$ -catenin-independent regulation of cadherin-11 steady state mRNA levels, and second a  $\beta$ -catenin-dependent effect on cadherin-11 3'UTR stability and protein translation.

**Conclusions:** Cadherin-11 mRNA and protein levels are regulated by the activity of GSK3 $\beta$  and a significant degree of this regulation is exerted by the GSK3 target,  $\beta$ -catenin, at the level of the cadherin-11 3'UTR

**Citation:** Farina AK, Bong Y-S, Feltes CM, Byers SW (2009) Post-Transcriptional Regulation of Cadherin-11 Expression by GSK-3 and  $\beta$ -Catenin in Prostate and Breast Cancer Cells. PLoS ONE 4(3): e4797. doi:10.1371/journal.pone.0004797

**Editor:** Juha Klefstrom, University of Helsinki, Finland

**Received:** July 16, 2008; **Accepted:** November 7, 2008; **Published:** March 10, 2009

**Copyright:** © 2009 Farina et al. This is an open-access article distributed under the terms of the Creative Commons Attribution License, which permits unrestricted use, distribution, and reproduction in any medium, provided the original author and source are credited.

**Funding:** DOD Idea Award DAMD17-01-1-0245 (SWB), DOD Prostate Cancer Research Predoctoral Traineeship Award W81XWH-05-1-0559 (AKF).

**Competing Interests:** The authors have declared that no competing interests exist.

\* E-mail: byerss@georgetown.edu

## Introduction

Cadherin-11, also known as OB-cadherin was first identified in mouse osteoblasts and is normally expressed in cells with a mesenchymal phenotype and of mesodermal origin, including the mesenchyme of the kidney and brain during development [1]. Cadherin-11 is also expressed in cartilage synoviocytes and is an important mediator of the synoviocyte reaction that characterizes rheumatoid arthritis [2,3]. The cadherin-11 knockout mouse exhibits bone and behavioral abnormalities and is resistant to induction of rheumatoid arthritis [2,3]. Additionally, cadherin-11 is expressed in several types of cancer including breast and prostate cancers, osteosarcoma, and colon cancer [4–8]. In these cancers cadherin-11 expression is associated with the most aggressive and most metastatic cancer cells.

Little is known about the regulation of cadherin-11 expression. TGF $\beta$ 1 regulates cadherin-11 in cultured extravillous cytotrophoblasts, and progesterone, but not 17-beta-estradiol, regulates cadherin-11 in cultured endometrial stromal cells undergoing decidualization [9,10]. During development cadherin-11 is expressed in cranial neural crest cells of the developing *Xenopus* embryo, and XWnt-8 overexpression increases Xcadherin-11 mRNA in *Xenopus* animal cap cells [11,12].

The principle pathway associated with canonical Wnt signaling involves inhibition of GSK3. GSK3 is intricately involved in many

pathways essential to cellular function. Other mechanisms that also negatively regulate GSK3 $\beta$  include GSK3 $\beta$  phosphorylation on Ser9 by Akt and inhibition by LiCl treatment and 6-bromindirubin-3'-oxime (BIO) treatment [18–20]. In the absence of canonical Wnts, GSK3 binds and phosphorylates  $\beta$ -catenin, in a multi-protein complex including axin, adenomatous polyposis coli (APC), and protein phosphatase 2A. Phosphorylation by GSK3 $\beta$  results in  $\beta$ -catenin protein degradation [13–15]. In the presence of canonical Wnts, activated Dishevelled prevents GSK3-dependent phosphorylation of  $\beta$ -catenin [17].

In this study we use breast cancer cells with low levels of endogenous activated GSK-3 and  $\beta$ -catenin and prostate cancer cells with constitutively activated GSK-3 and  $\beta$ -catenin to show that, GSK3 $\beta$  regulates cadherin-11 expression in two ways. The first mechanism is through  $\beta$ -catenin-independent regulation of steady state cadherin-11 mRNA levels. The second mechanism involves a  $\beta$ -catenin-dependent effect on cadherin-11 3'UTR stability and protein translation.

## Results

### Cell density and inhibition of GSK3 $\beta$ regulate cadherin-11 mRNA and protein expression

MDA-MB-231 cells, a mesenchymal-like breast cancer cell line that expresses cadherin-11, have undetectable levels of other

cadherins and low levels of activated  $\beta$ -catenin. In pilot experiments we noticed that cadherin-11 expression varied noticeably depending on the number of cells plated. Figure 1 shows that cells grown at higher cell densities had markedly increased cadherin-11 mRNA (Figure 1A) and protein (Figure 1B) expression on a per cell basis compared to those grown at low density. In *Xenopus laevis*, cadherin-11 is regulated by xWnt8, although it is not known if the cadherin-11 gene is a direct transcriptional target or if either the canonical or non-canonical pathways are involved [11]. To test if the canonical Wnt pathway regulates cadherin-11 in MDA-MB-231 cells, we treated cells with lithium chloride (LiCl), an inhibitor of GSK3 $\beta$ . LiCl treatment repressed cadherin-11 mRNA and protein levels and blocked the effects of increased cell density (Figure 1A, B). Cadherin-11 protein levels were also inhibited by LiCl in three other cell-lines (BT549, Hs578t and PC-3 Figure 1C). Remarkably, N-cadherin, which is endogenously expressed by these cell-lines and not by MDA-MB-231 cells, was unaffected by LiCl, strongly indicating that inhibition of GSK3 $\beta$  specifically regulated cadherin-11 expression. If the effects of LiCl are due to transient inhibition of GSK3 $\beta$  we anticipated that removal of LiCl should reverse its effects on cadherin 11. Figure 1D shows that this is indeed the case as cadherin-11 levels returned to control values 12 hours following LiCl washout. To confirm that the effects of LiCl were related to inhibition of GSK3 $\beta$ , we treated cells with 6-bromindirubin-3'-oxime (BIO), a small molecule kinase inhibitor selective for GSK3 $\alpha/\beta$  (Figure 1E, F). Inhibition of GSK3 $\beta$  with BIO stabilized  $\beta$ -catenin, and like LiCl, reduced cadherin-11 mRNA and protein accumulation. Furthermore, siRNA directed against GSK3 $\beta$  mRNA decreased cadherin-11 protein expression in the absence of either LiCl or BIO in MDA-MB-231 but not in PC-3 cells (Figure 1G). Therefore, GSK3 $\beta$  knockdown had little effect on cadherin-11 levels in PC-3 cells (Figure 1G). Unlike MDA-231 cells, PC-3 cells have high levels of nuclear activated  $\beta$ -catenin as a result of a PTEN mutation and constitutive inactivation of GSK3 $\beta$  [21]. Consequently, removal of GSK3 $\beta$  in these cells may have less effect as it is already inactivated.

### Recruitment of RNA polymerase II to the cadherin-11 gene is unaffected by

To test if GSK3 $\beta$  regulates cadherin-11 expression at the level of transcription, MDA-MB-231 cells were treated with the RNA polymerase II inhibitor, actinomycin D and were compared to the results of cells treated with LiCl. Figure 2A shows that cadherin-11 mRNA levels declined following either LiCl or actinomycin D treatment. However, in this experiment, and on other occasions, we noticed that LiCl treatment repressed cadherin-11 mRNA levels more rapidly than actinomycin D suggesting an additional non-transcriptional level of regulation. If the effects of GSK3 $\beta$  inhibition on cadherin-11 mRNA have a transcriptional component, we would anticipate that recruitment of RNA polymerase II to the cadherin-11 gene to decrease. To test this hypothesis, we carried out RNA polymerase II chromatin immunoprecipitation assays (Pol II ChIP) using cadherin-11 specific primers which amplify a portion of intron 1 (see Materials and Methods). Figure 2B shows that, as expected, actinomycin D markedly reduced the amount of Pol II recruited to both GAPDH and the cadherin-11 gene. However, even though cadherin-11 mRNA levels are markedly reduced by treatment of cells with BIO (Figure 1) it did not affect Pol II recruitment to the cadherin-11 gene (Figure 2B). In other experiments we found that members of the Snail/Slug family, transcriptional repressors known to be regulated by GSK3 $\beta$  and by  $\beta$ -catenin are not involved in cadherin-11 repression (Figure S1) [22]. Taken together these

experiments indicate that inhibition of GSK3 $\beta$  by LiCl or BIO influences cadherin-11 mRNA and protein levels by mechanisms largely independent of transcriptional repression.

### The cadherin-11 3'untranslated region (UTR) is highly conserved and destabilizing in cadherin-11 expressing cells

In many situations regulation of mRNA stability and its capacity for translation are mediated by the 3'-untranslated region (UTR). If the cadherin-11 3'-UTR is important in the normal regulation of cadherin-11 expression we might expect it to be conserved across species. Table 1 shows the percent identity of the human cadherin-11 and E-cadherin transcripts and 3'-UTRs compared with other species. Remarkably for a region that is not translated the cadherin-11 3'-UTR was almost completely conserved across species (94% human with mouse). In contrast the E-cadherin-3'UTR is poorly conserved (17% human with mouse). Analysis of the secondary structure of this region of both the cadherin-11 and E-cadherin 3'UTRs revealed a high degree of stem loop structures (Figure 3B and Figure 3C). These observations strongly suggest that the cadherin-11 3'UTR has a conserved regulatory function.

The NCBI database identifies a region of the cadherin 3'UTR which spans approximately 1 kb and includes a traditional poly-A signal and site. However, the Ensembl database identifies a cadherin-11 3'UTR of roughly 3 kb which includes a second poly A signal 2363 bp from the stop codon (Figure 3A). The poly-A signal sequences (AAUAAA) within the 3'UTR are bolded in Figure 3A. Blue highlighted sequences indicate Shaw-Kamens sequences, also known as AU-rich elements (AREs [Shaw and Kamen, 1986]). Many microRNA binding elements also exist in the cadherin-11 3'UTR (too numerous to indicate) as determined by ARGONAUTE 2 and miRanda. To determine the actual length of the cadherin-11 3'UTR, total RNA was isolated from PC3 metastatic prostate cancer cells (Figure 3D), MDA-MB-231 cells (data not shown), and MRC5 lung fibroblast cells (data not shown) for analysis. Primers were designed approximately every 500 bp of the Ensembl sequence to make progressively shorter PCR products. In all three cell lines primers designed to produce a PCR product of 1451 bp amplify a product, but the primers designed to make a product of 1952 bp do not (Figure 3D). Although, this 501bp does not include a poly-A signal or addition site one does exist at position 2363 indicating that this longer transcript may be an alternate 3'-UTR.

To investigate the function of the cadherin-11 3'-UTR, it was cloned from MDA-MB-231 genomic DNA. A series of stop codons were included at the 5'-end of the construct followed by the DNA sequence directly 3' to exon 13, the 3'-UTR. Both the NCBI and Ensembl 3'UTRs were cloned using the red highlighted primer sequences in Figure 3A into a luciferase reporter vector and named luc-CDH11 3'UTR NCBI and luc-CDH11 3'UTR Ensembl, respectively.

In cadherin-11 positive PC-3 and MDA-231 cells both luc-CDH11 3'UTR NCBI and luc-CDH11 3'UTR Ensembl were significantly less active than pGL3, which has the SV40 poly A addition signal and site (Figure 4A). In HEK293 cells which do not express cadherin-11, luc-CDH11 3'UTR Ensembl was more active than either control vector or luc-CDH11 3'UTR NCBI (Figure 4A). These data indicate that the both cadherin-11 3'UTRs confer destabilization properties when expressed in cells which normally make cadherin-11. In contrast, in HEK293 cells, which do not normally make cadherin-11, luc-CDH11 3'UTR Ensembl but not luc-CDH11 3'UTR NCBI is stabilizing.

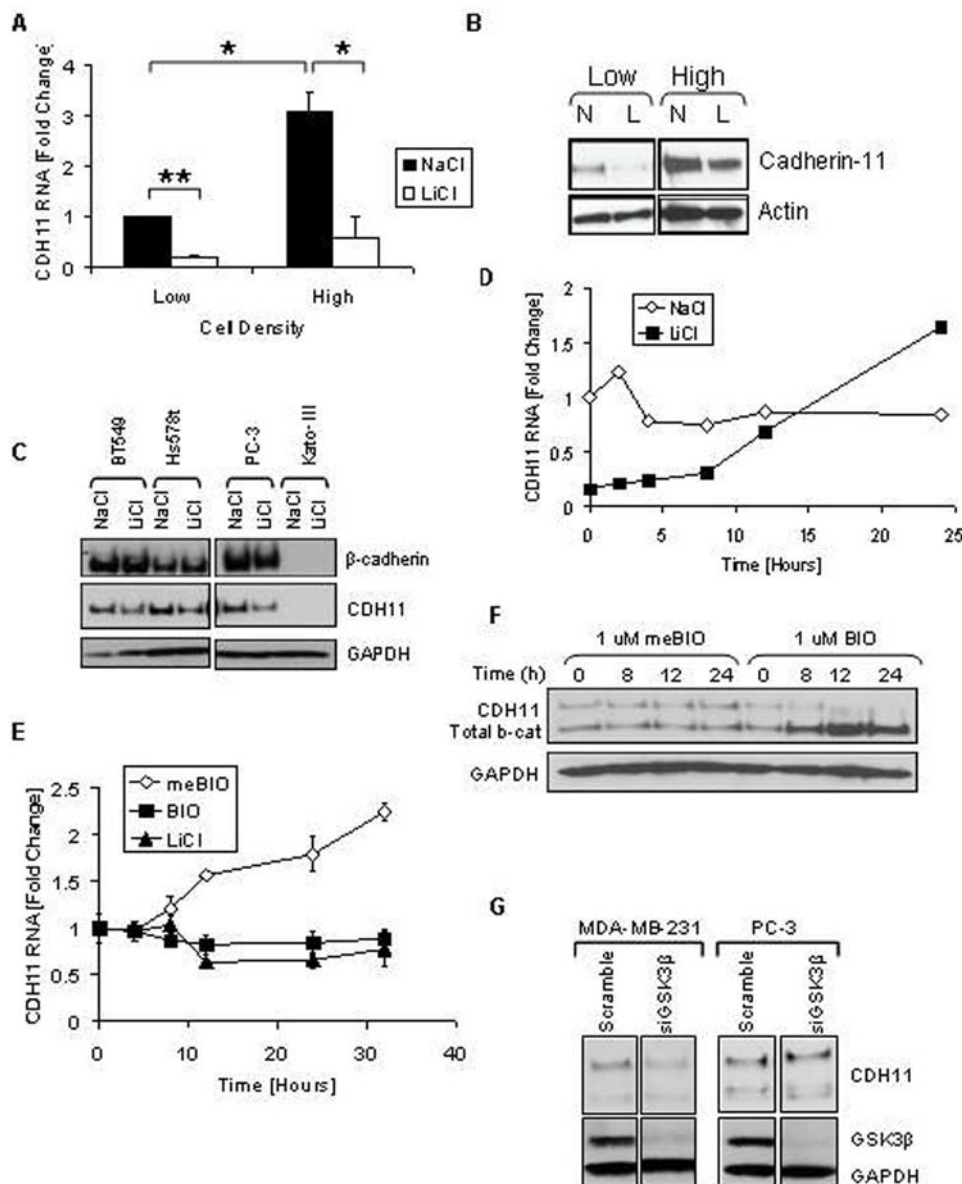

**Figure 1. Density increases cadherin-11 and GSK3 $\beta$  inhibitors decrease cadherin-11 expression.** **A and B:** MDA-MB-231 cells were plated at two densities, 50% and 90% confluency, called low and high, respectively. The cells were allowed to grow overnight in serum-free medium. 24 hours after plating cells were treated with 20 mM NaCl (N) or 20 mM LiCl (L). 24 hours after treatment, RNA and protein were collected for real-time PCR (A) and Western (B) analysis. **C:** Cancer cells BT549, Hs578T, PC-3, and Kato-III were plated at a medium density and allowed to adhere. Cells were then treated with 20 mM LiCl or NaCl control. 48 hours after transfection protein was collected for Western blot analysis. **D:** MDA-MB-231 cells were plated at a medium density, serum starved overnight, and treated with 20 mM NaCl or 20 mM LiCl. 24 hours after treatment, the cells were washed once with PBS and maintained in serum-free medium containing only 20 mM NaCl. RNA was collected at the times indicated for real-time PCR analysis. **E and F:** MDA-MB-231 cells were plated at a medium density and serum starved overnight. 16 hours after plating, the cells were treated with 1  $\mu$ M meBIO (control), 1  $\mu$ M BIO, or 20 mM LiCl. RNA (E) or protein (F) was collected at the designated times and analyzed using real-time PCR (E) and Western blot analysis (F). **G:** MDA-MB-231 and PC-3 cells were transfected with either non-specific scrambled siRNA (siScramble), or siRNA directed against GSK3 $\beta$  (si GSK3 $\beta$ ). 48 hours after transfection protein was isolated for Western blot analysis. doi:10.1371/journal.pone.0004797.g001

### The activity of the cadherin-11 (UTR) is regulated by Dicer

To investigate if microRNA influenced the activity of luc-CDH11 3'-UTR we knocked down Dicer, which is essential for the production of microRNAs. Removal of Dicer significantly increased the activity of luc-CDH11 3'-UTR indicating that microRNAs regulate the endogenous activity of the cadherin-11 3'-UTR (Figure 4B). Consistent with a role for miRNA, several putative miRNA binding sites exist in this region, however, none of these predicted miRNAs was regulated by inhibition of GSK3 $\beta$

(Figure S2). These data demonstrate that although miRNAs can regulate luc-CDH11 3'-UTR this is not the mechanism whereby GSK3 $\beta$  inhibition regulated cadherin-11 mRNA levels. Unlike siRNAs, which always direct mRNA degradation, miRNAs often regulate protein translation without affecting mRNA levels [23–25]. To test this we examined the effects of Dicer knockdown on cadherin-11 protein and mRNA levels. Figures 4C and 4D show that even in the face of Dicer knockdown, endogenous cadherin-11 mRNA and protein levels were unchanged and the repressive

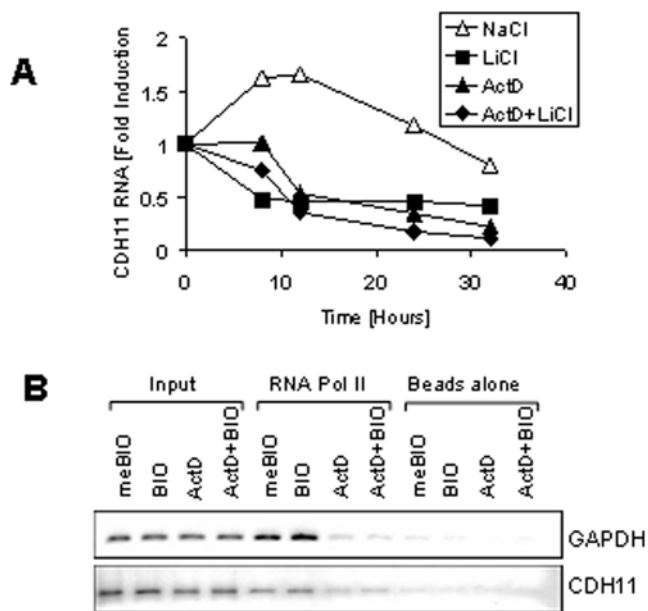

**Figure 2. Transcriptional mechanism of cadherin-11 regulation.** **A:** MDA-MB-231 cells were grown at a medium density for 16 hours in the absence of serum. The cells were then pretreated with 5  $\mu$ g/ml actinomycin D or an equivalent volume of ethanol (untreated). 30 minutes later the cells were treated with either 20 mM NaCl (control) or LiCl. At the indicated time points, RNA and protein were collected for real-time PCR analysis. **B:** MDA-MB-231 cells were treated with 20 mM NaCl or LiCl for 24 hours. Genomic DNA was then harvested for RNA polymerase II ChIP analysis followed by PCR specific to GAPDH and cadherin-11.

doi:10.1371/journal.pone.0004797.g002

effects of LiCl were not reversed. These data indicate that although the basal activity of the cadherin-11 3'UTR is affected by Dicer knockdown, cadherin-11 mRNA and protein levels are not.

### $\beta$ -catenin regulates the activity of the cadherin-11 3'UTR, steady state mRNA levels and cadherin-11 protein translation in PC-3 cells

Perhaps the best known substrate of GSK3 $\beta$  is  $\beta$ -catenin and many studies have shown that Wnt-mediated inhibition of GSK3 $\beta$  stabilizes and activates cytoplasmic  $\beta$ -catenin [17,26]. Although the effects of inhibition of GSK3 $\beta$  on cadherin-11 are not mediated transcriptionally it is possible that stabilization of  $\beta$ -catenin may repress cadherin-11 mRNA and/or protein levels using an alternative mechanism. To test this PC-3 cells, which normally express high levels of activated  $\beta$ -catenin, were transfected with luc-CDH11 3'UTR Ensembl or luc-CDH11

3'UTR NCBI and treated with  $\beta$ -catenin siRNA [21]. Like Dicer knockdown, knockdown of  $\beta$ -catenin significantly increased the activity/stability of both cadherin-11 3'UTR reporters (Figure 5A). However, in contrast to Dicer knockdown, removal of  $\beta$ -catenin significantly increased cadherin-11 protein and steady state mRNA levels in PC-3 cells (Figure 5C).

## Discussion

The majority of patients dying from breast or prostate cancer have metastases to the skeleton. Although bone metastases are incurable, patients survive several years suffering serious morbidity, including fractures, spinal cord compression, severe bone pain, and hypercalcemia [5,27]. In the adult, cadherin-11 is strongly expressed in bone as well as certain metastatic cancers, particularly those inclined to metastasize to bone [4,6,27]. Once in the bone, it is possible that these cadherin-11-expressing tumor cells activate either osteoclasts or osteoblasts, depending on the type of cancer metastasis, leading to bone remodeling. As the bone is remodeled, growth factors are released into the matrix further stimulating the tumor cells by creating a fertile environment for growth. These changes are reminiscent of those that occur during rheumatoid arthritis, a disease that is also characterized by an important role for cadherin-11 in the activated synovocyte [2,3]. Given its role in these important diseases we sought to determine how cadherin-11 expression is regulated. In the present study we show that cadherin-11 mRNA and protein levels are increased by high cell density and are markedly regulated by the activity of the ubiquitous serine/threonine kinase GSK3 $\beta$ . Remarkably, a significant degree of regulation is exerted by the GSK3 $\beta$  target,  $\beta$ -catenin, at the level of the cadherin-11 3'UTR.

### A role for GSK3 $\beta$ and $\beta$ -catenin in cadherin-11 mRNA and protein homeostasis

The best studied mechanism by which GSK3 $\beta$  is regulated is Akt-dependent serine phosphorylation. Growth factors, such as insulin, activate the phosphatidylinositol 3-kinase (PI3K)/Akt pathway. PI3K converts PIP<sub>2</sub> to PIP<sub>3</sub>, a critical step necessary for the activation of PKB/Akt. PTEN is a phosphatase commonly mutated in cancers that is necessary for the dephosphorylation of PIP<sub>3</sub> thereby inhibiting Akt activation. Once activated Akt acts on many cellular proteins including mTOR, caspase 9, Bad, IKK, and GSK3 $\beta$ . Akt phosphorylates GSK3 $\beta$  on serine 9 and GSK3 $\alpha$  on serine 21 to inhibit their kinase activity. Understanding GSK3 $\beta$  regulation by the Akt pathway is important to the present study because a PTEN mutation in PC-3 prostate cancer cells results in activated Akt, GSK3 $\beta$  inhibition, and activation of endogenous  $\beta$ -catenin [28]. Importantly, GSK3 $\beta$  is central to the promotion of inflammation in various inflammatory diseases including colitis and arthritis [29,30]. The second well-defined mechanism of

**Table 1. Untranslated region and coding sequence alignment.**

| ClustalW Nucleotide Sequence Alignment compared to <i>H. sapiens</i> |                                    |                   |                                     |                    |                           |                              |
|----------------------------------------------------------------------|------------------------------------|-------------------|-------------------------------------|--------------------|---------------------------|------------------------------|
| Species                                                              | E-cadherin protein coding sequence | E-cadherin 3' UTR | Cadherin-11 protein coding sequence | Cadherin-11 5' UTR | Cadherin-11 3' UTR (NCBI) | Cadherin-11 3' UTR (Ensembl) |
| <i>M. musculus</i>                                                   | 79                                 | 17                | 89                                  | 84                 | 94                        | 85                           |
| <i>R. norvegicus</i>                                                 | 80                                 | 27                | 90                                  | 76                 | 94                        | 84                           |
| <i>P. troglodytes</i>                                                | 99                                 | 98                | 99                                  | 98                 | 99                        | 99                           |
| <i>G. gallus</i>                                                     | 64                                 | N/A               | 80                                  | 59                 | 86                        | 68                           |

doi:10.1371/journal.pone.0004797.t001

## Ensemble

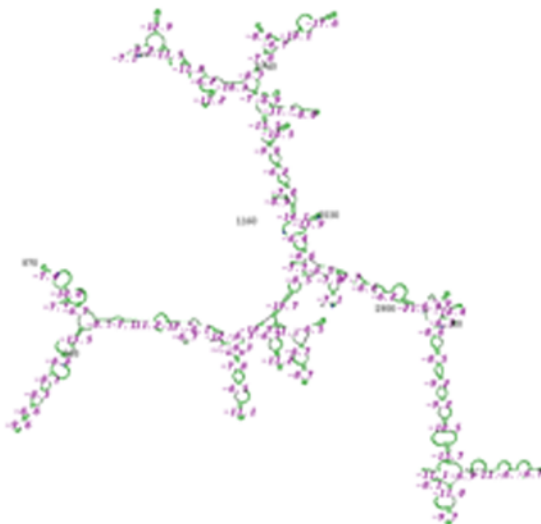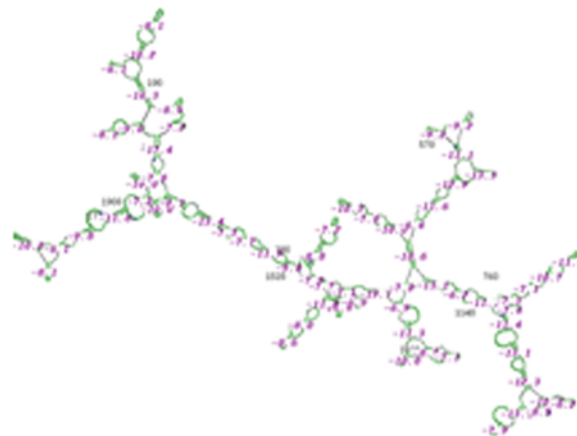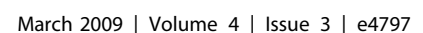

**Figure 3. *In silico* evaluation of the cadherin-11 3'-UTR.** **A:** Sequence of cadherin-11 3'-UTR according to the Ensembl database (NM\_001797). Bolded sequences indicate the poly-A signals and site respectively. Blue highlighted sequences indicate Shaw-Kamens, destabilizing sequences. The first two red highlighted sequences indicate the primers used to design pGL3-CDH11-3'UTR NCBI, as denoted by the bracket. The first and last red highlighted sequences indicate the primers used to design pGL3-CDH11-3'UTR Ensembl, as denoted by the bracket. **B:** Predicted secondary structure of the Ensembl cadherin-11 3'-UTR (as predicted by GeneBee). **C:** Predicted secondary structure of the Ensembl E-cadherin 3'-UTR (as predicted by GeneBee). **D:** RT-PCR of PC3 RNA using primers designed approximately every 500 bp.  
doi:10.1371/journal.pone.0004797.g003

GSK3 $\beta$  regulation is the canonical Wnt pathway in which inhibition of GSK3 $\beta$  and stabilization of  $\beta$ -catenin results in marked changes in gene expression. Although many studies have observed that Wnt-GSK3 $\beta$ -mediated activation of  $\beta$ -catenin results in accumulation of nuclear and cytoplasmic  $\beta$ -catenin, most studies concentrate on the function of  $\beta$ -catenin as a transcriptional co-activator of TCF, and more recently nuclear receptors, in the nucleus [31–33]. However,  $\beta$ -catenin has significant homology to the RNA binding protein pumilio and several recent studies have pointed to an important role for  $\beta$ -catenin in post-transcriptional regulation [34]. For example,  $\beta$ -catenin regulates VEGF-D, cyclooxygenase-2 and cyclin D1 mRNA stability potentially by interaction with their respective 3'-UTRs [35–38].  $\beta$ -catenin can also regulate alternative splicing of estrogen receptor  $\beta$  (ER $\beta$ ) in colon cancer cells [35–38]. The ribosome-associated factor eIF6 associates with  $\beta$ -catenin and the complex may have a role in translational regulation in concert with miRNAs [39,40]. However, although the endogenous activity

of the cadherin-11 3'-UTR is regulated by Dicer, cadherin-11 mRNA and protein regulation by GSK3 $\beta$  are not, ruling out a role for miRNAs in this process. Our data show that the activity of the cadherin-11 3'-UTR is regulated by  $\beta$ -catenin in cells which normally express activated  $\beta$ -catenin such as PC-3 prostate cancer cells. Taken together these data point to an important role for GSK3 $\beta$  and  $\beta$ -catenin in cadherin-11 mRNA and protein homeostasis and may lead to the development of therapeutics for diseases such as, metastatic prostate and breast cancer and rheumatoid arthritis, that are characterized by elevated cadherin-11. Indeed inhibition of GSK3 $\beta$  or ablation of the GSK3 $\beta$  gene ameliorates inflammation dependent arthritis [29].

## Materials and Methods

### Materials and Reagents

LiCl (L9650), NaCl (S3014), and actinomycin D (A1410) were obtained from Sigma-Aldrich (Germany), meBIO (361556) and

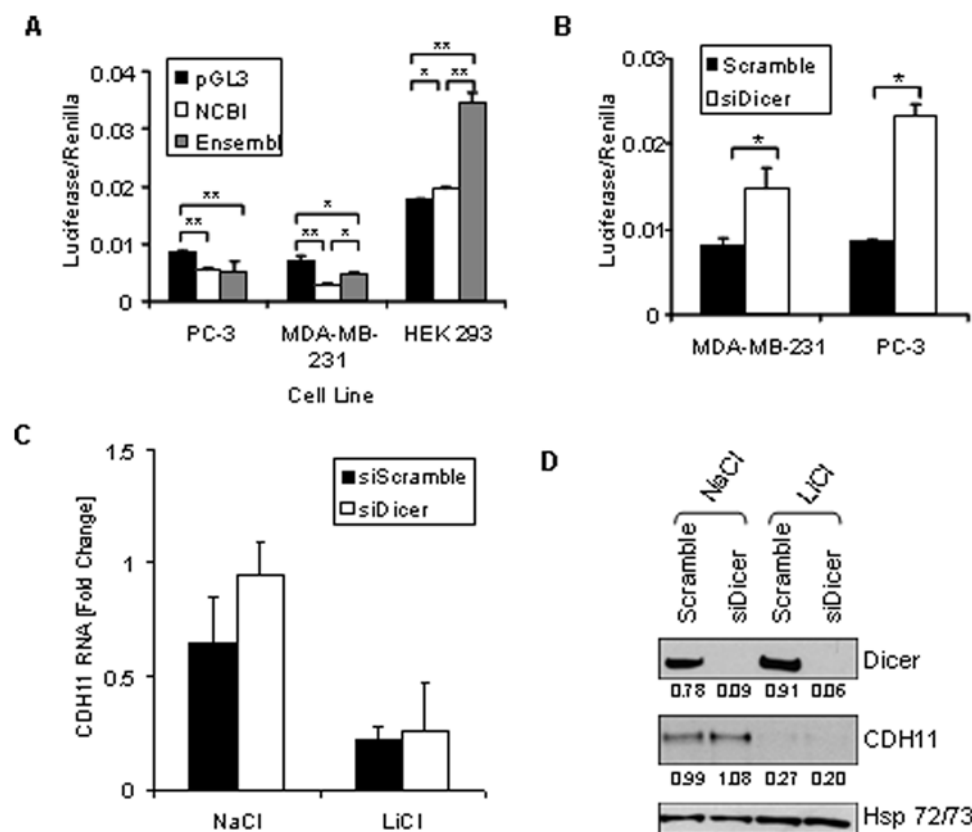

**Figure 4. The stabilizing and destabilizing effects of the cadherin-11 3'-UTR.** **A:** PC-3, MDA-MB-231, and HEK 293 cells were transfected with pGL3-Promoter, pGL3-CDH11-3'UTR NCBI, or pGL3-CDH11-3'UTR Ensembl and pCMV-Renilla. 48 hours after transfection, cells were lysed using passive lysis buffer and luciferase activity was analyzed. (\* indicates a p-value >0.01; \*\* indicates a p-value >0.001) **B:** MDA-MB-231 and PC-3 cells were transfected with pGL3-CDH11 3'-UTR and pCMV-Renilla along with either non-specific siRNA (siScramble) or siRNA directed against Dicer (siDicer). 48 hours after transfection, cells were lysed using passive lysis buffer and luciferase activity was analyzed. (\* indicates a p-value >0.05) **C and D:** MDA-MB-231 cells were transfected with non-specific siRNA (siScramble), or siRNA directed against Dicer (si Dicer). Cells were collected for real-time PCR (C) and Western blot (D) analysis 72 hours after transfection.  
doi:10.1371/journal.pone.0004797.g004

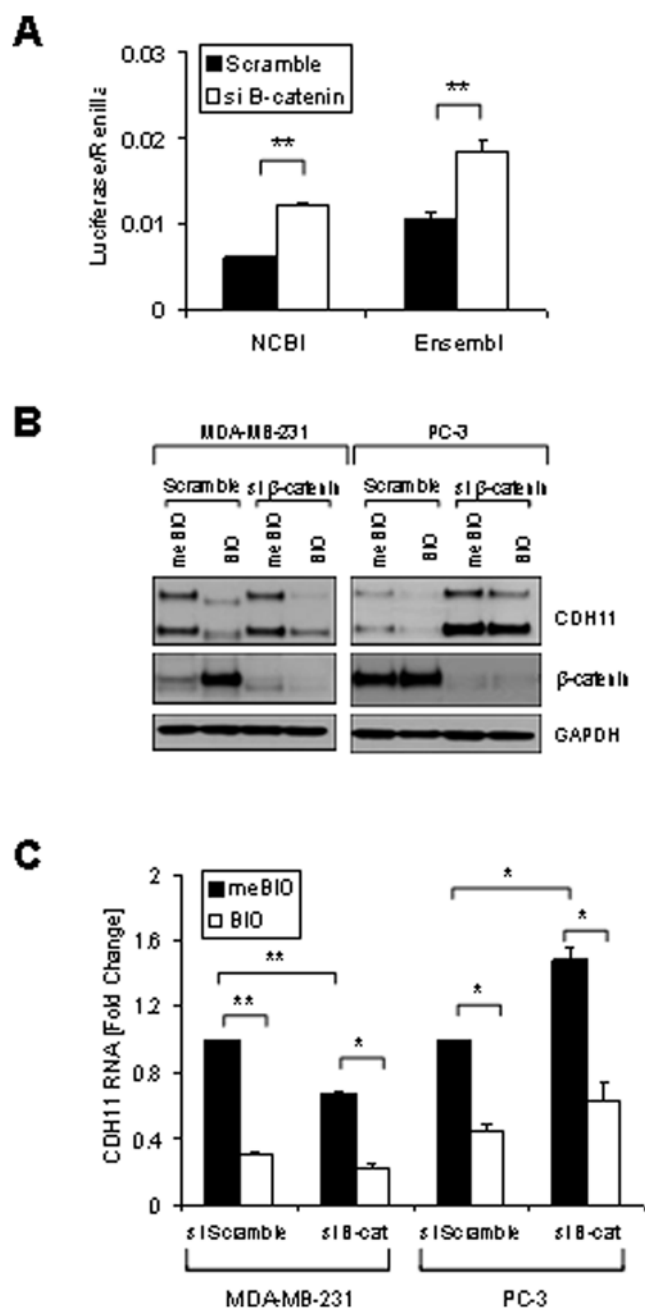

**Figure 5. β-catenin as a regulator of cadherin-11 expression. A:** PC-3 cells were transfected with pGL3-CDH11-3'UTR NCBI or pGL3-CDH11-3'UTR Ensembl and pCMV-Renilla and along with either non-specific siRNA or siRNA directed against CTNNB1. 48 hours after transfection cells were lysed using passive lysis buffer and luciferase activity was analyzed. Luciferase activity was normalized to renilla activity. (\*\* indicates a p-value >0.001). **B:** MDA-MB-231 and PC-3 cells were transfected with either non-specific scrambled siRNA (siScramble) or siRNA directed against CTNNB1 (si β-cat). 24 hours after transfection cells were treated with 1 μM BIO or meBIO (control). 48 hours after transfection protein was isolated for Western blot analysis. **C:** MDA-MB-231 and PC-3 cells were transfected with either non-specific scrambled siRNA (siScramble) or siRNA directed against CTNNB1 (si β-cat). 24 hours after transfection cells were treated with 1 μM BIO or meBIO (control). 48 hours after transfection RNA was isolated for real-time PCR analysis. (\* indicates a p-value >0.05; \*\* indicates a p-value >0.005)

doi:10.1371/journal.pone.0004797.g005

BIO (361550) from Calbiochem (San Diego, CA), anti-cadherin-11 (5B2H5) from Invitrogen (32-1700, Carlsbad, CA), anti-β-catenin antibody from BD Biosciences (610154, San Jose, CA), Dicer antibody from Abcam (ab14601, Cambridge, MA), anti-GSK3β antibody from Cell Signaling Technologies (9315, Boston, MA), anti-FLAG (M2) was from Sigma (F3165, Germany), anti-GAPDH was from Research Diagnostics Inc (TRK5G4-6C5, Flanders, NJ), anti-Snail (H-130) (sc-28199) antibody from Santa Cruz. The anti-eIF6 antibody S13 was a generous gift from Dr. Biffo and generated against a C-terminus peptide of eIF6 [40,41]. Small interfering RNA (siRNA) reagent (SMART pool) for human CTNNB1 (M-003482-00), Dicer (M-003483-00), and GSK3β (M-003010-03), were purchased from Dharmacon (Lafayette, CO). Non-specific (Scramble) siRNA was generated using forward: (5'-AAGCTCCTATAGCGTATGGTGCCTGTCTC-3') and reverse: (5'-CACCATACGCTATAGGAGCTTCCTGTCTC-3') primers and the Silencer siRNA Construction kit (AM1620, Ambion, Austin, TX).

### Expression Vectors

Plasmid DNA encoding wild type (WT) β-catenin was used as previously described and DNA encoding wild type Snail was a kind gift from Dr. Mien-Chie Hung [15,22]. Dominant negative (DN) Snail was generated by PCR from the wild type Snail construct using primers described in Yamasaki *et al.* forward: (5'-CGGGATCCACATATGGCCTTCAACTGCAAATACTG-3') and reverse: (5'-CGCTCGAGGCGGGGACATCCTGAGCA-3') and cloned into pCMV-Tag2 (Stratagene, La Jolla, CA) using *Bam*HI and *Xho*I restriction sites [42]. Cadherin-11 3'-UTR fragment was cloned from genomic DNA obtained from MDA-MB-231 cells using Expand High Fidelity PCR System (11732641001, Roche, Indianapolis, IN) according to the manufacturer's protocol. For amplification of the CDH11 3'UTR NCBI forward:

(5'-TGCTAGCTAAGTAAGTAACAATAACGATACAAATTT-3') and reverse:

(5'-CCGGATCCACGCGTGAATCTTGTCTGAAAAACATTTG-3') primers were used. For amplification of the CDH11 3'UTR Ensembl forward:

(5'-TGCTAGCTAAGTAAGTAACAATAACGATACAAATTT-3') and reverse:

(5'-GGATCCACGCGTGTTCACCTGACATACAGAGCC-3') primers were used. These PCR products were ligated in place of the SV40 3'UTR of pGL3-Promoter (Promega, Madison, WI).

### Cell Culture and Transfection

MDA-MB-231, Hs578T, BT549 breast cancer cells, PC-3 prostate cancer cells, and HEK293 cells were maintained in Dulbecco's Modified Eagle's Medium (DMEM) supplemented with 5% fetal bovine serum (FBS) in 5% CO<sub>2</sub> incubator at 37°C. All transient transfections of plasmid DNA and siRNA in MDA-MB-231 and PC-3 cells were performed with Amaxa electroporation system (Amaxa, Inc, Gaithersburg, MD) according to the manufacturer's protocol. Transient transfections for immunofluorescence were performed using Lipofectamine 2000 Transfection Reagent (11668-019, Invitrogen, Carlsbad, CA) and luciferase analysis using Lipofectamine 2000 (Invitrogen) for PC-3 cells, ProFectin Mammalian Transfection System—Calcium Phosphate (E1200, Promega, Madison, WI) for MDA-MB-231 cells, and FuGENE 6 Transfection Reagent (11814443001, Roche, Switzerland) for HEK293 cells.

## RNA isolation

**RNA isolation (mRNA).** MDA-MB-231 or PC-3 cells were incubated in the presence or absence of LiCl (20mM) or BIO (1  $\mu$ M) for 24 h. RNA was isolated using Trizol (15596-018, Invitrogen) combined with RNAeasy (74106, Qiagen, Valencia, CA) according to the manufacturer's instructions.

**Total RNA isolation (microRNA).** MDA-MB-231 cells incubated in the presence or absence of 20 mM LiCl for 24 hours. Total RNA was isolated using the miRVana RNA isolation kit (AM1562, Ambion).

## Real time quantitative PCR

**mRNA.** Relative quantitation was used to evaluate the raw data obtained from real-time PCR (7900 HT real time PCR system, Applied Biosystems, Foster City, CA). Single-stranded cDNA was prepared using TaqMan Reverse Transcription Reagents (N808-0234, Applied Biosystems) following the manufacturer's protocol. TaqMan Universal PCR Master Mix (4304437, Applied Biosystems) was used for all reactions. All primer/probe mixes (CDH11 Hs00156438\_m1, GAPDH Hs99999905\_m1) were obtained from Applied Biosystems and performed in triplicate. The samples were analyzed using the delta-delta Ct method of analysis [43]. The final value obtained was a measure of the fold change in gene expression for the particular gene of interest between the treated sample and the untreated sample. Experiments were run in triplicate, and for all analyses a p-value of <0.05 was considered to be statistically significant.

**microRNA.** cDNA was generated by TaqMan MicroRNA Reverse Transcription kit (4366596, Applied Bioscience) following manufacturer's protocol. Primer/probe mixes specific for each microRNA (RNU6B, 4373381; hsa-miR-19a, 4373099; hsa-miR-27a, 4373287; hsa-miR-33, 4373048; hsa-miR-101, 4373159; hsa-miR-133b, 4373172; hsa-miR-337, 4373044; hsa-miR-424, 4373201) were obtained from Applied Biosystems (Foster City, CA). TaqMan Universal Master PCR Mix (4304437, Applied Biosystems) was used for all reactions. All experiments were performed in triplicate. The average value of the triplicate readings for each unknown was normalized to the corresponding value for U6 RNA. The samples were analyzed using the delta-delta Ct method of analysis [43]. The final value obtained was a measure of the fold change in gene expression for the particular gene of interest between the treated sample and the untreated sample. For all analyses a P-value of <0.05 was considered to be statistically significant.

## Chromatin immunoprecipitation (ChIP) analysis

One 15 cm tissue culture dishes were plated with 95% confluent MDA-MB-231 cells for each condition. Cells were treated with 5  $\mu$ g/ml actinomycin D for 30 minutes in serum-free DMEM. As specified, cells were incubated with 20 mM NaCl or LiCl for an additional 24 hours. 37% formaldehyde solution was added to each plate for a final concentration of 1.5% and incubated at 37°C for 15 minutes. Plates were washed one time with PBS containing 0.125 M glycine and Complete Mini Protease Inhibitor Cocktail (11836153001, Roche), and then a second time with PBS plus inhibitor. Cells were collected and spun for at 2000 rpm, 4°C for 5 minutes. The pellet was resuspended in 1 ml SDS lysis buffer (1% SDS, 10 mM EDTA, 50 mM Tris-HCl, pH 8.1) with protease inhibitors. Cells were then sonicated using a 15 second on, 45 second off program 4 times consecutively; then diluted 1:10 in ChIP Dilution Buffer (0.01% SDS, 1.1% Triton X-100, 1.2 mM EDTA, 16.7 mM Tris-HCl, pH .1, 167 mM NaCl) plus protease inhibitor. The samples were then precleared overnight at

4°C with 75  $\mu$ l Protein A/G Plus-agarose beads (sc-2003, Santa Cruz) supplemented with 3  $\mu$ l 10 mg/ml Sonicated Salmon Sperm DNA (201190, Stratagene, La Jolla, CA) and 13  $\mu$ l 1 mg/ml BSA. Samples were then incubated with 10  $\mu$ g RNA Polymerase II (N-20) (sc-899, Santa Cruz) overnight, tumbling at 4°C. Add 40  $\mu$ l Protein A/G Plus-agarose beads for 2 hours rotating at 4°C. Samples were spun at 1000 rpm for 1 minute, then washed once with each: Low Salt Immune Complex Wash Buffer (0.1% SDS, 1% Triton X-100, 2 mM EDTA, 20 mM Tris-HCl, pH 8.1, 150 mM NaCl), High Salt Immune Complex Wash Buffer (0.1% SDS, 1% Triton X-100, 2 mM EDTA, 20 mM Tris-HCl, pH 8.1, 500 mM NaCl), LiCl Immune Complex Wash Buffer (0.25 M LiCl, 1% Nonidet P-40, 1% deoxycholic acid, 1 mM EDTA, 10 mM Tris-HCl, pH 8.1), and TE buffer. Samples were eluted twice in 100  $\mu$ l in elution buffer (1% SDS, 0.1 M NaHCO<sub>3</sub>) vortexing for 15 minutes at room temperature. 12  $\mu$ l 5 M NaCl was added to eluate and incubated at 65°C overnight. Then 4  $\mu$ l 0.5 M EDTA, 8  $\mu$ l 1M Tris-HCl, pH 6.5 and 2  $\mu$ l of 10 mg/ml proteinase K was added and incubated at 45°C for 1 hour. The samples were cleaned up using the QIAGEN PCR Clean up kit (QIAGEN). PCR was performed using TaKaRa Premix Ex Taq kit (RR039, TaKaRa, Otsu, Shiga, Japan). The final reaction contains: 1  $\times$  Premix Ex Taq, 2.5  $\mu$ M of each primer, 8% DMSO, and 20% processed DNA (or 20% of a 1:10 dilution of input). For amplification of GAPDH, forward: (5'-TACTAGCGGTTTACGGGCG-3') reverse: (5'-TCGAA-CAGGAGGAGCAGAGAGCGA-3'). For amplification of CDH11,

forward: (5'-AAAGCAAAAGGGAGGGAGA-3')

reverse: (5'-AGGTACAAACCCCTCTGCT-3') primers were used.

## Immunoblotting

Cells were treated for the indicated times. Cells were rinsed once with PBS and lysed with sample buffer (2% SDS, 10% glycerol, 10 mM Tris, pH 7.5) containing 1 mM sodium orthovanadate, 0.05 M sodium fluoride, and Complete mini protease inhibitors (11836153001, Roche Applied Science, Indianapolis, IN). Cell lysates were boiled for 10 minutes. Protein concentration was determined with a Bio-Rad DC Protein Assay (500-0116, Bio-Rad, Hercules, CA). After SDS-poly acrylamide gel electrophoresis, proteins were transferred to Protran BA 83 Nitrocellulose (10402495, Germany). Membranes were blocked with 5% milk in Tris-Buffered Saline containing 0.1% Tween-20, and incubated with primary antibody overnight at 4°C and subsequently with HRP-labeled secondary antibody. Proteins were visualized with ECL chemiluminescent reagents (RPN2106, Amersham Biosciences, Piscataway, NJ) or SuperSignal West Femto (34095, Pierce biotechnology Inc., Rockford, IL) using X-ray films (Denville Scientific Inc., Metuchen, NJ).

## Luciferase Assay Analysis

Cells were plated at  $2 \times 10^5$  in a 12-well plate in growth medium. Cells were transfected in triplicate with 1.8  $\mu$ g of *luciferase* plasmid DNA and 0.2  $\mu$ g of pCMV-*Renilla* (Promega). For cells treated with anti-Dicer siRNA, 100 nM siRNA was transfected together with *Luciferase* and *Renilla* using Amaxa nucleofection and collected and analyzed 48 hours later. Cells at varying densities were transfected using Amaxa nucleofection and  $1.67 \times 10^5$  cells (low) or  $6.25 \times 10^5$  cells (high) were plated in triplicate in a 12-well plate. Cells treated with meBIO or BIO (1  $\mu$ M) were transfected in triplicate using Fugene6 (Roche). 24 hours after transfection, cells were treated with either BIO or meBIO. 48 hours after treatment cells were collected. In all cases, cells were lysed using passive lysis

buffer provided with the Dual-*Luciferase* Reporter Assay System (Promega). 20 µl of each sample was loaded in duplicate in a 96-well plate and analyzed using the Dual-*Luciferase* Reporter Assay System reagents (E1960, Promega). The plate was read on a Berthold MicroLumat Plus LB 96V (Germany) using WinGlow software (Berthold).

## Supporting Information

### Figure S1

Found at: doi:10.1371/journal.pone.0004797.s001 (0.15 MB PDF)

### Figure S2

Found at: doi:10.1371/journal.pone.0004797.s002 (0.01 MB PDF)

## References

1. Simonneau L, Kitagawa M, Suzuki S, Thiery JP (1995) Cadherin 11 expression marks the mesenchymal phenotype: towards new functions for cadherins? *Cell Adhes Commun* 3: 115–130.
2. Kiener HP, Lee DM, Agarwal SK, Brenner MB (2006) Cadherin-11 induces rheumatoid arthritis fibroblast-like synoviocytes to form lining layers in vitro. *Am J Pathol* 168: 1486–1499.
3. Lee DM, Kiener HP, Agarwal SK, Noss EH, Watts GF, et al. (2007) Cadherin-11 in synovial lining formation and pathology in arthritis. *Science* 315: 1006–1010.
4. Bussemakers MJ, Van Bokhoven A, Tomita K, Jansen CF, Schalken JA (2000) Complex cadherin expression in human prostate cancer cells. *Int J Cancer* 85: 446–450.
5. Guise TA (2000) Molecular mechanisms of osteolytic bone metastases. *Cancer* 88: 2892–2898.
6. Guise TA, Chirgwin JM (2003) Transforming growth factor-beta in osteolytic breast cancer bone metastases. *Clin Orthop*. pp S32–38.
7. Pishvaian MJ, Feltes CM, Thompson P, Bussemakers MJ, Schalken JA, et al. (1999) Cadherin-11 is expressed in invasive breast cancer cell lines. *Cancer Res* 59: 947–952.
8. Tomita K, van Bokhoven A, van Leenders GJ, Ruijter ET, Jansen CF, et al. (2000) Cadherin switching in human prostate cancer progression. *Cancer Res* 60: 3650–3654.
9. Chen GT, Getsios S, MacCalman CD (1999) Cadherin-11 is a hormonally regulated cellular marker of decidualization in human endometrial stromal cells. *Mol Reprod Dev* 52: 158–165.
10. Getsios S, Chen GT, Huang DT, MacCalman CD (1998) Regulated expression of cadherin-11 in human extravillous cytotrophoblasts undergoing aggregation and fusion in response to transforming growth factor beta 1. *J Reprod Fertil* 114: 357–363.
11. Hadeball B, Borchers A, Wedlich D (1998) *Xenopus* cadherin-11 (Xcadherin-11) expression requires the Wg/Wnt signal. *Mech Dev* 72: 101–113.
12. Vallin J, Girault JM, Thiery JP, Broders F (1998) *Xenopus* cadherin-11 is expressed in different populations of migrating neural crest cells. *Mech Dev* 75: 171–174.
13. Laney JD, Hochstrasser M (1999) Substrate targeting in the ubiquitin system. *Cell* 97: 427–430.
14. Maniatis T (1999) A ubiquitin ligase complex essential for the NF-kappaB, Wnt/Wingless, and Hedgehog signaling pathways. *Genes Dev* 13: 505–510.
15. Orford K, Crockett C, Jensen JP, Weissman AM, Byers SW (1997) Serine phosphorylation-regulated ubiquitination and degradation of beta-catenin. *J Biol Chem* 272: 24735–24738.
16. Yook JI, Li XY, Ota I, Hu C, Kim HS, et al. (2006) A Wnt-Axin2-GSK3beta cascade regulates Snail1 activity in breast cancer cells. *Nat Cell Biol* 8: 1398–1406.
17. Polakis P (2000) Wnt signaling and cancer. *Genes Dev* 14: 1837–1851.
18. Cross DA, Alessi DR, Cohen P, Andjelkovich M, Hemmings BA (1995) Inhibition of glycogen synthase kinase-3 by insulin mediated by protein kinase B. *Nature* 378: 785–789.
19. Sato N, Meijer L, Skaltsounis L, Greengard P, Brivanlou AH (2004) Maintenance of pluripotency in human and mouse embryonic stem cells through activation of Wnt signaling by a pharmacological GSK-3-specific inhibitor. *Nat Med* 10: 55–63.
20. Stambolic V, Ruel L, Woodgett JR (1996) Lithium inhibits glycogen synthase kinase-3 activity and mimics wingless signalling in intact cells. *Curr Biol* 6: 1664–1668.
21. McMenamin ME, Soung P, Perera S, Kaplan I, Loda M, et al. (1999) Loss of PTEN expression in paraffin-embedded primary prostate cancer correlates with high Gleason score and advanced stage. *Cancer Res* 59: 4291–4296.
22. Zhou BP, Deng J, Xia W, Xu J, Li YM, et al. (2004) Dual regulation of Snail by GSK-3beta-mediated phosphorylation in control of epithelial-mesenchymal transition. *Nat Cell Biol* 6: 931–940.
23. Doench JG, Petersen CP, Sharp PA (2003) siRNAs can function as miRNAs. *Genes Dev* 17: 438–442.
24. Doench JG, Sharp PA (2004) Specificity of microRNA target selection in translational repression. *Genes Dev* 18: 504–511.
25. Petersen CP, Bordeleau ME, Pelletier J, Sharp PA (2006) Short RNAs repress translation after initiation in mammalian cells. *Mol Cell* 21: 533–542.
26. Rubinfeld B, Albert I, Porfiri E, Fiol C, Munemitsu S, et al. (1996) Binding of GSK3beta to the APC-beta-catenin complex and regulation of complex assembly. *Science* 272: 1023–1026.
27. Chirgwin JM, Guise TA (2000) Molecular mechanisms of tumor-bone interactions in osteolytic metastases. *Crit Rev Eukaryot Gene Expr* 10: 159–178.
28. Ohigashi T, Mizuno R, Nakashima J, Marumo K, Murai M (2005) Inhibition of Wnt signaling downregulates Akt activity and induces chemosensitivity in PTEN-mutated prostate cancer cells. *Prostate* 62: 61–68.
29. Hu X, Paik PK, Chen J, Yafilina A, Kockeritz L, et al. (2006) IFN-gamma suppresses IL-10 production and synergizes with TLR2 by regulating GSK3 and CREB/AP-1 proteins. *Immunity* 24: 563–574.
30. Whittle BJ, Varga C, Posa A, Molnar A, Collin M, et al. (2006) Reduction of experimental colitis in the rat by inhibitors of glycogen synthase kinase-3beta. *Br J Pharmacol* 147: 575–582.
31. Barker N, Morin PJ, Clevers H (2000) The Yin-Yang of TCF/beta-catenin signaling. *Adv Cancer Res* 77: 1–24.
32. Easwaran V, Pishvaian M, Salimuddin, Byers S (1999) Cross-regulation of beta-catenin-LEF/TCF and retinoid signaling pathways. *Curr Biol* 9: 1415–1418.
33. Shah S, Islam MN, Dakshanamurthy S, Rizvi I, Rao M, et al. (2006) The molecular basis of vitamin D receptor and beta-catenin crossregulation. *Mol Cell* 21: 799–809.
34. Edwards TA, Pyle SE, Wharton RP, Aggarwal AK (2001) Structure of Pumilio reveals similarity between RNA and peptide binding motifs. *Cell* 105: 281–289.
35. Lee HK, Choi YS, Park YA, Jeong S (2006) Modulation of oncogenic transcription and alternative splicing by beta-catenin and an RNA aptamer in colon cancer cells. *Cancer Res* 66: 10560–10566.
36. Lee HK, Jeong S (2006) Beta-Catenin stabilizes cyclooxygenase-2 mRNA by interacting with AU-rich elements of 3'-UTR. *Nucleic Acids Res* 34: 5705–5714.
37. Lee HK, Kwak HY, Hur J, Kim IA, Yang JS, et al. (2007) beta-catenin regulates multiple steps of RNA metabolism as revealed by the RNA aptamer in colon cancer cells. *Cancer Res* 67: 9315–9321.
38. Orlandini M, Semboloni S, Oliviero S (2003) Beta-catenin inversely regulates vascular endothelial growth factor-D mRNA stability. *J Biol Chem* 278: 44650–44656.
39. Chendrimada TP, Finn KJ, Ji X, Baillat D, Gregory RI, et al. (2007) MicroRNA silencing through RISC recruitment of eIF6. *Nature* 447: 823–828.
40. Ji Y, Shah S, Soanes K, Islam MN, Hoxter B, et al. (2008) Eukaryotic initiation factor 6 selectively regulates Wnt signaling and beta-catenin protein synthesis. *Oncogene* 27: 755–762.
41. Biffo S, Sanvito F, Costa S, Preve L, Pignatelli R, et al. (1997) Isolation of a novel beta4 integrin-binding protein (p27(BBP)) highly expressed in epithelial cells. *J Biol Chem* 272: 30314–30321.
42. Yamasaki H, Sekimoto T, Ohkubo T, Douchi T, Nagata Y, et al. (2005) Zinc finger domain of Snail functions as a nuclear localization signal for importin beta-mediated nuclear import pathway. *Genes Cells* 10: 455–464.
43. Dussault AA, Pouliot M (2006) Rapid and simple comparison of messenger RNA levels using real-time PCR. *Biol Proced Online* 8: 1–10.

## Acknowledgments

The authors wish to thank Robert Lechleider for his advice and Becky Hoxter for her technical expertise and acknowledge the support the following LCCC Core Facilities (NIH P30 CA51008): microscopy, tissue culture, macromolecular analysis and microarray.

## Author Contributions

Conceived and designed the experiments: AKF CMF SWWB. Performed the experiments: AKF YSB. Analyzed the data: AKF YSB SWWB. Contributed reagents/materials/analysis tools: AKF YSB CMF. Wrote the paper: AKF SWWB.
