# Supplementary material for: Post-Transcriptional Regulation of Cadherin-11 Expression by GSK-3 and β-Catenin in Prostate and Breast Cancer Cells
Source: PLOS journal article supplement (doi:10.1371/journal.pone.0004797), 2009-03-09
Supplement: S1 (10.1371/journal.pone.0004797.s001) [file journal.pone.0004797.s001]

**A**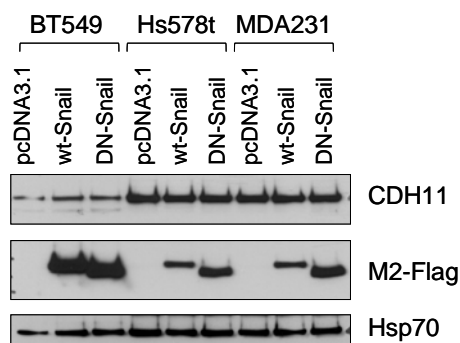**B**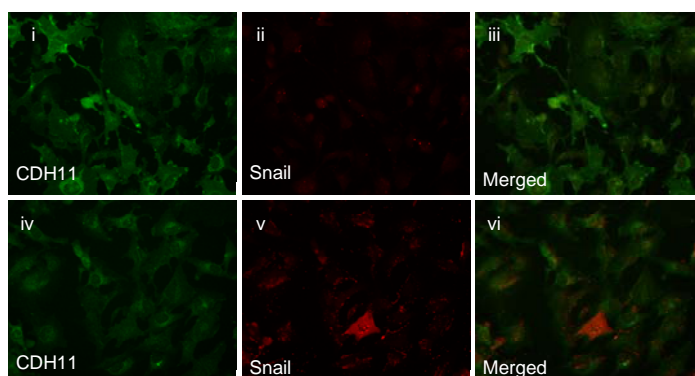

**Figure S1: Snail fails to regulate cadherin-11 expression.** **A:** Breast cancer cells, BT549, Hs578T, and MDA-MB-231 (MDA231), were plated at a medium density. Cells were transfected with pcDNA3, Flag-wt-Snail, or Flag-DN-Snail. 48 hours after transfection protein was collected for Western blot analysis. **B:** Hs578t breast cancer cells were transfected with either control vector (i-iii) or wild type Snail (iv-vi). 48 hours after transfection, the cells were immunostained for cadherin-11 (CDH11) or Snail.
