# Supplementary material for: Post-Transcriptional Regulation of Cadherin-11 Expression by GSK-3 and β-Catenin in Prostate and Breast Cancer Cells
Source: PLOS journal article supplement (doi:10.1371/journal.pone.0004797), 2009-03-09
Supplement: S2 (10.1371/journal.pone.0004797.s002) [file journal.pone.0004797.s002]

**A**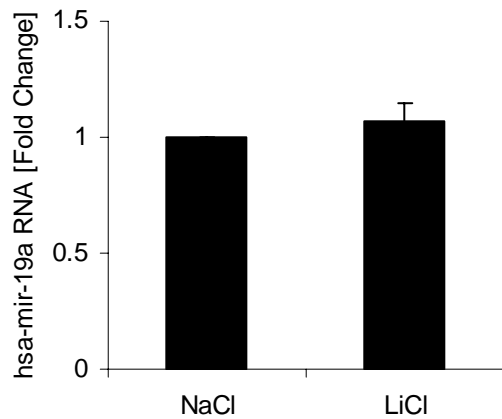**B**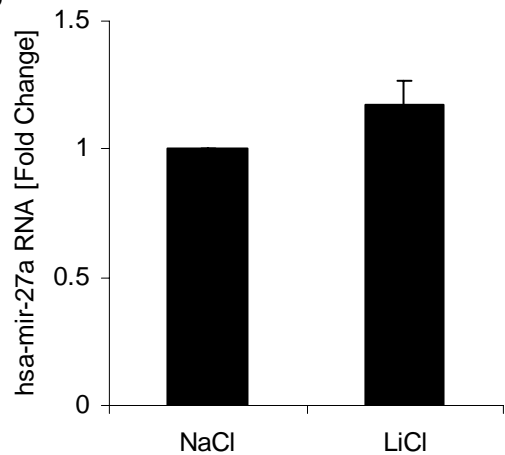**C**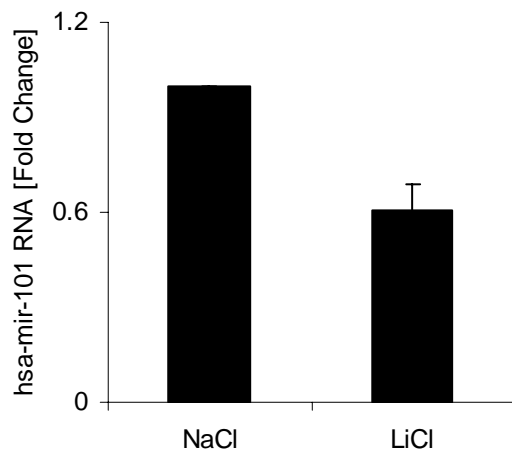**D**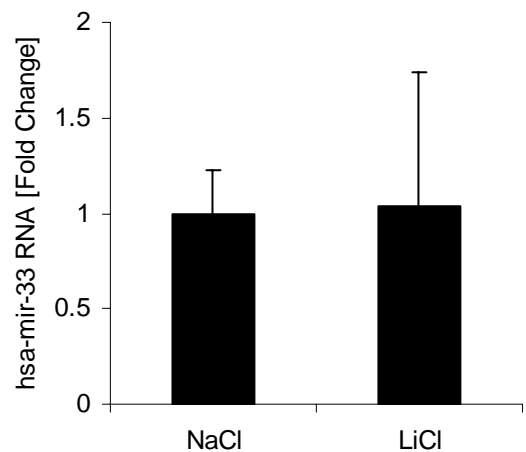**E**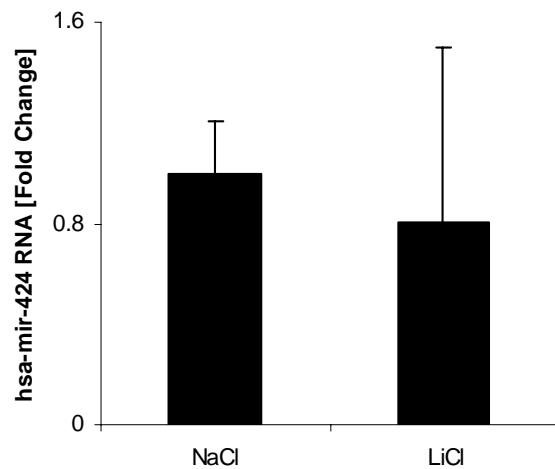**F**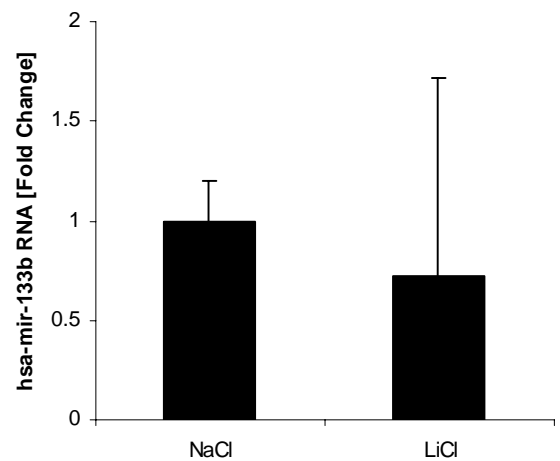

**Figure S2: MicroRNAs predicted to bind to the cadherin-11 3'-UTR. A through F:** MDA-MB-231 cells were treated with 20 mM LiCl or NaCl (control). 24 hours after treatment, total RNA was harvested for real-time PCR analysis.
